# Supplementary material for: Structure-Immunogenicity Relationship of α- and β-Tetrasaccharide Glycoforms from Bacillus anthracis Exosporium and Fragments Thereof
Source: PubMed Central journal article supplement (PMC6222408; doi:10.3390/molecules23082079), 2018-08-20
Supplement: molecules-23-02079-s001.pdf [file molecules-23-02079-s001.pdf]

Supplemental information

# Structure-immunogenicity relationship of $\alpha$ - and $\beta$ -tetrasaccharide glycoforms from *Bacillus anthracis* exosporium and fragments thereof

Riccardo De Ricco <sup>1</sup>, Christy L. Ventura<sup>2</sup>, Filippo Carboni <sup>1</sup>, Rina Saksena <sup>3,4</sup>, Pavol Kováč <sup>3</sup>,

Roberto Adamo <sup>1\*</sup>

<sup>1</sup> GSK, Research Centre, via Fiorentina 1, 53100 Siena, Italy; riccardo.x.de-ricco@gsk.com; filippo.x.carboni@gsk.com

<sup>2</sup> Department of Microbiology and Immunology, Uniformed Services University of the Health Sciences, Bethesda, MD 20814; christy.ventura.ctr@usuhs.edu

<sup>3</sup> NIDDK, LBC, National Institutes of Health, Bethesda, MD 20892-0815; kovac@nidk.nih.gov

<sup>4</sup> Current Address: The University of New Mexico, Department of Chemistry, Albuquerque, NM 87131; rsaksena@unm.edu.

\* Correspondence: roberto.x.adamo@gsk.com; Tel.: +39 0577 539393

### Anti Bacillus cereus antibody levels

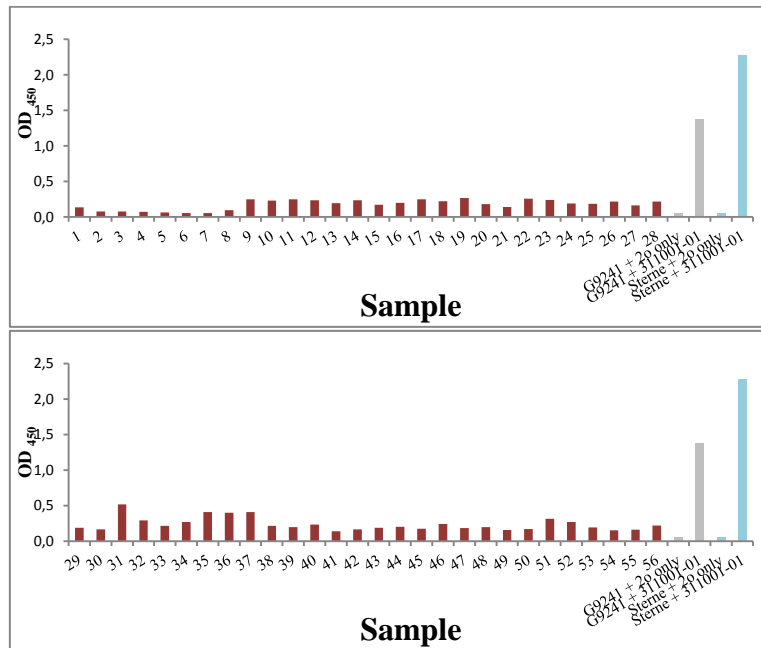

Figure S1. Reactivity of anti conjugate sera with *B. cereus* G9241 spores of sera diluted 1:160.
